# Supplementary material
Source: Frontiers journal article supplement (https://www.frontiersin.org/articles/163370)
Supplement: Table_4.docx [file Table_4.docx]

**Appendix D.** List of sources used for meta-analysis.

Aber, J.D., A. Magill, R. Boone, J.M. Melillo, and P. Steudler. 1993. Plant and soil responses to chronic

nitrogen additions at Harvard Forest, Massachusetts. Ecological Applications 3: 156-166.

Albaugh, T. J., H. L. Allen, B. R. Zutter, and H. E. Quicke. 2003. Vegetation control and fertilization in

midrotation *Pinus taeda* stands in the southeastern United States. Annals of Forest Science 60:

619-624.

Albaugh, T. J., H. L. Allen, and T. R. Fox. 2008. Nutrient use and uptake in *Pinus taeda*. Tree Physiology

28: 1083-1098.

Allen, C. B., R. E. Will, R. C. McGarvey, D. R. Coyle, and M. D. Coleman. 2005. Radiation-use efficiency

and gas exchange responses to water and nutrient availability in irrigated and fertilized stands of

sweetgum and sycamore. Tree Physiology 25: 191-200.

Allen, M.F., E.B. Allen, and J.L. Lansing. 2010. Responses to chronic N fertilization of ectomycorrhizal pinon but not arbuscular mycorrhizal juniper a pinon-juniper woodland. Journal of Arid Environments 74: 1170-1176.

Alongi, D.M. 2011. Early growth responses of mangroves to different rates of nitrogen and phosphorus

supply. Journal of Experimental Marine Biology and Ecology 397: 85-93.

Amponsah, I. G., P. G. Comeau, R. P. Brockley, and V. J. Lieffers. 2005. Effects of repeated fertilization on

needle longevity, foliar nutrition, effective leaf area index, and growth characteristics of

lodgepole pine in interior British Columbia, Canada. Canadian Journal of Forest Research 35:

440-451.

Anderson, K.M., M.D. Corre and B.L. Turner. 2010. Plant-soil associations in a lower montane tropical

forest: physiological acclimation and herbivore-mediated response to nitrogen additions.

Functional Ecology 6: 1171-1180.

Arevalo, C. B. M., A. P. Drew, and T. A. Volk. 2005. The effect of common Dutch white clover (*Trifolium*

*repens* L.), as a green manure, on biomass production, allometric growth and foliar nitrogen of

two willow clones. Biomass and Bioenergy 29: 22-31.

Atkinson, D., and A.W. Davison. 1971. The effects of phosphorus deficiency on the growth of *Epilobium*

*montanum* L. New Phytologist 70: 789-797.

Baddeley, J.A., S.J. Woodin, and I.J. Alexander. 1994. Effects of increased nitrogen and phosphorus

availability on the photosynthesis and nutrient relations of three arctic dwarf shrubs from

Svalbard. Functional Ecology 8: 676-685.

Benner, B.L., and F.A. Bazazz. 1988. Carbon and mineral element accumulation and allocation in two

annual plant species in response to timing of nutrient addition. Journal of Ecology 76: 19-40.

Bennett, J. N., L. L. Blevins, J. E. Barker, D. P. Blevins, and C. E. Prescott. 2003. Increases in tree growth

and nutrient supply still apparent 10 to 13 years following fertilization and vegetation control of

salal-dominated cedar-hemlock stands on Vancouver Island. Canadian Journal of Forest

Research 33: 1516-1524.

Bethers, S., M.E. Day, G. Bruce, I.J. Fernandez, and J. Alexander. 2009. Effects of chronically elevated

nitrogen and sulfur deposition on sugar maple saplings: Nutrition, growth, and physiology.

Forest Ecology and Management 258: 895-902.

Billow, C., P.A. Matson, and B. Yoder. 1994. Seasonal biochemical change in coniferous forest canopies

and their response to fertilization. Tree Physiology 14: 564-574.

Bilodeau-Gauthier S., D. Pare, C. Messier et al. 2011. Juvenile growth of hybrid poplars on acidic boreal

soil determined by environmental effects of soil preparation, vegetation control, and

fertilization. Forest Ecology and Management 261: 620-629.

Birk, E.M. and P.M. Vitousek. 1986. Nitrogen dynamics and nitrogen use efficiency in loblolly pine

stands. Ecology 67: 69-79.

Bjorkman, C.S., Larsson, and R. Gref. 1991. Effects of nitrogen fertilization on pine needle chemistry and

sawfly performance. Oecologia 86: 202-209.

Blazier, M. A., and T. C. Hennessey. 2008. Seasonal soil and foliage nutrient dynamics of a juvenile

loblolly pine plantation: Impacts of fertilizer formulation and vegetation suppression. Forest

Ecology and Management 255: 3404-3415.

Block, R.M., J.D. Knight, and N.W.H. Booth. 2009. Nursery stock type, nitrogen fertilization and shoot

pruning effects on the growth of juvenile hybrid poplar in Saskatchewan. Canadian Journal of

Plant Science 89: 289-301.

Borer, E. T., V.T. Adams, G.A. Engler, A.L. Adams, C.B. Schumann, and E.W. Seabloom. 2009. Aphid

fecundity and grassland invasion: Invader life history is the key. Ecological Applications 19: 1187-

1196.

Bowman, W.D., T.A. Theodose, and M.C. Fisk. 1995. Physiological and production responses of plant

growth forms to increases in limiting resources in alpine tundra: Implications for differential

community response to environmental change. Oecologia 101: 217-227.

Bowman, W.D., T.A. Theodose, J.C. Schardt, and R.T. Conant. 1993. Constraints of nutrient availability on

primary production in two alpine tundra communities. Ecology 74: 2085-2097.

Braun, S., V. Thomas, R. Quiring, and W. Flueckiger. 2010. Does nitrogen deposition increase forest

production? The role of phosphorus. Environmental Pollution 158: 2043-2052.

Brix, H. 1981. Effects of nitrogen fertilizer source and application rates on foliar nitrogen concentration,

photosynthesis, and growth of Douglas fir (*Pseudotsuga menziesii*). Canadian Journal of Forest

Research 11: 775-780.

Brockley, R.P. 1995. Effects of nitrogen source and season of application on the nutrition and growth of

lodgepole pine. Canadian Journal of Forest Research 25: 516-526.

Brockley, R. P. 2007. Effects of 12 years of repeated fertilization on the foliar nutrition and growth of

young lodgepole pine in the central interior of British Columbia. Canadian Journal of Forest

Research 37: 2115-2129.

Brown, K. R., and P. J. Courtin. 2007. Phosphorus additions increase the early growth of red alder (*Alnus*

*rubra* Bong.) on Vancouver Island. Western Journal of Applied Forestry 22: 116-123.

Brown, K.R., P.J. Courtin, R.W. Roderick. 2011. Growth, foliar nutrition and delta 13C responses of red

alder (*Alnua rubra*) to phosphorus additions soon after planting on moist sites. Forest Ecology

and Management 262: 791-802.

Bubier, J.L., R. Smith, and S. Juutinen. 2011. Effects of nutrient addition on leaf chemistry, morphology, and photosynthetic capacity of three bog shrubs. Oecologia 167: 355-368.

Burney, O.T. and D.F. Jacobs. 2011. Ungulate herbivory of regenerating conifers in relation to foliar

nutrition and terpenoid production. Forest Ecology and Management 262: 1834-1845.

Burslem, D.F.R.P., P.J. Grubb, and I.M. Turner. 1995. Responses to nutrient addition among shade-

tolerant seedlings of lowland tropical rain forest in Singapore. Journal of Ecology 83: 113-122.

Callaway, R.M., DeLucia, E.H., and W. H. Schlesinger. 1994. Biomass allocation of montane and desert

ponderosa pine: An analog for response to climate change. Ecology 75: 1974-1481.

Cambridge, M.L. and Kendrick, G.A. 2009. Contrasting responses of seagrass transplants (*Poisonia*

*australis*) to nitrogen, phosphorus and iron addition in an estuary and a coastal embayment.

Journal of Experimental Marine Biology and Ecology 371: 34-41.

Campo, J., and R. Dirzo. 2003. Leaf quality and herbivory responses to soil nutrient addition in secondary

tropical dry forests of Yucatan, Mexico. Journal of Tropical Ecology 19: 525-530.

Chang, S. X. 2003. Seedling sweetgum (*Liquidambar styraciflua* L.) half-sib family response to N and P

fertilization: Growth, leaf area, net photosynthesis and nutrient uptake. Forest Ecology and

Management 173: 281-291.

Chapin, F.S., III, and G.R. Shaver. 1996. Physiological and growth responses of arctic plants to a field

experiment simulating climatic change. Ecology 77: 822-840.

Chen, F-S., D-H. Zeng , T.J. Fahey , C-Y. Yao and Z-Y Yu. 2010. Response of leaf anatomy of *Chenopodium acuminatum* to soil resource availability in a semi-arid grassland. Plant Ecology 209: 375-382.

Cheng, X., Y. Luo, and B. Su. 2009. Responses of net ecosystem CO2 exchange to nitrogen fertilization in

experimentally manipulated grassland ecosystems. Agricultural and Forest Meteorology 149:

1956-1963.

Choi, W.-J., S. X. Chang, H. L. Allen, D. L. Kelting, and H.-M. Ro. 2005. Irrigation and fertilization effects on

foliar and soil carbon and nitrogen isotope ratios in a loblolly pine stand. Forest Ecology and

Management 213: 90-101.

Choi, W.-J., S. X. Chang, and X. Hao. 2005. White spruce response to co-composted hydrocarbon-

contaminated drilling waste: Effects of compost age and nitrogen fertilization. Journal of

Environmental Quality 34: 1319-1327.

Christ, M., Y. Zhang, G.E. Likens, and C.T. Driscoll. 1995. Nitrogen retention capacity of a northern

hardwood forest under ammonium sulfate additions. Ecological Applications 5: 802-812.

Coleman, M., D. Tolsted, T. Nichols, W. D. Johnson, E. G. Wene, and T. Houghtaling. 2006. Post-

establishment fertilization of Minnesota hybrid poplar plantations. Biomass and Bioenergy 30:

740-749.

Corbin, J.D., Avis, P., and R.B. Wilbur. 2003. The role of phosphorus availability in the response of soil

nitrogen cycling, understory vegetation and arbuscular mycorrhizal inoculum potential to

elevated nitrogen inputs. Water, Air, and Soil Pollution 147: 141-161.

Cordell, S., G. Goldstein, F.C. Meinzer, and P.M. Vitousek. 2001. Regulation of leaf life-span and nutrient-

use efficiency of *Metrosideros polymorpha* trees at two extremes of a long chronosequence in

Hawaii. Oecologia 127: 198-206.

Cornelissan, T., and P. Stiling. 2006. Does low nutritional quality act as a plant defense? An experimental

test of the slow-growth, high mortality hypothesis. Ecological Entomology 31: 32-40.

Cornelissan, T., and P. Stiling. 2006. Responses of different herbivore guilds to nutrient addition and

natural enemy exclusion. Ecoscience 13: 66-74.

Crane, W.J.B., and J.C.G. Banks. 1992. Accumulation and retranslocation of foliar nitrogen in fertilized

and irrigated *Pinus radiata*. Forest Ecology and Management 52: 201-223.

Crous, J.W., A.R. Morris, and M.C. Scholes. 2011. Changes in topsoil, standing litter and tree nutrient

content of *Pinus patula* plantation after phosphorus and potassium fertilization. European

Journal of Forest Research 130: 277-292.

Cuevas-Reyes, P., F.T. Oliveira-Ker, and G.W. Geraldo. 2011. Abundance of gall-inducing insect species in

sclerophyllous savanna: understanding the importance of soil fertility using an experimental

approach. Journal of Tropical Ecology 27: 631-640.

Davis, M. R., R. B. Allen, and P. W. Clinton. 2004. The influence of N addition on nutrient content, leaf

carbon isotope ratio, and productivity in a *Nothofagus* forest during stand development.

Canadian Journal of Forest Research 34: 2037-2048.

Day, F.P., Jr. 1987. Effects of flooding and nutrient enrichment on biomass allocation in *Acer rubrum*

seedlings. American Journal of Botany 74: 1541-1554.

Derby, S. A., and L. E. Hinesley. 2005. Fertilizing containerized Atlantic white cedar seedlings. Journal of

Environmental Horticulture 23: 97-100.

DesRochers, A., R. van den Driessche, and B. R. Thomas. 2006. NPK fertilization at planting of three

hybrid poplar clones in the boreal region of Alberta. Forest Ecology and Management 232: 216-

225.

Drake, D. C., B. J. Peterson, L. A. Deegan, L. A. Harris, E. E. Miller, and R. S. Warren. 2008. Plant nitrogen

dynamics in fertilized and natural New England salt marshes: a paired N-15 tracer study. Marine

Ecology Progress Series 354: 35-46.

Drenovsky, R. E., and J. H. Richards. 2005. Nitrogen addition increases fecundity in the desert shrub

*Sarcobatus vermiculatus*. Oecologia 143: 49-356.

Driessche, R. v. d., F. Niemi, and L. Charleson. 2005. Fourth year response of aspen seedlings to lime,

nitrogen and phosphorus applied at planting and 1 year after planting. Forest Ecology and

Management 219: 216.

Eatough, J.M., M.E. Fenn, and T.D. Paine. 2011. The effect of nitrogen additions on bracken fern and its

insect herbivores at sites with high and low atmospheric pollution. Anthropod-Plant Interactions

5: 163-173.

Effler, R. S., R. A. Goyer, and G. J. Lenhard. 2006. Baldcypress and water tupelo responses to insect

defoliation and nutrient augmentation in Maurepas Swamp, Louisiana, USA. Forest Ecology and

Management 236: 295-304.

Egiarte, G., M.C. Arbestain, A. Alonso, E. Ruiz-Romera, and M. Pinto. 2005. Effect of repeated applications of sewage sludge on the fate of N in soils under Monterey pine stands. Forest Ecology and Management 216: 257-269.

Egli, P., S. Maurer, M.S. Gunthardt-Georg, and C. Korner. 1998. Effects of elevated CO2 and soil quality

on leaf gas exchange and above-ground growth in beech-spruce model ecosystems. New

Phytologist 140: 185-196.

Elvir, J.A., G.B. Wiersma, and S. Bethers. 2010. Effects of chronic ammonium sulfate treatment on the

forest at the Bear Brook Watershed in Maine. Environmental Monitoring and Assessment 171:

129-147.

Elvir, J. A., L. Rustad, G. B. Wiersma, I. Fernandez, A. S. White, and G. J. White. 2005. Eleven-year

response of foliar chemistry to chronic nitrogen and sulfur additions at the Bear Brook

Watershed in Maine. Canadian Journal of Forest Research 35: 1402-1410.

Everett, C.J. and H. Palm-Leis. 2009. Availability of residual phosphorus fertilizer for loblolly pine. Forest

Ecology and Management 258: 2207-2213.

Fang, H., G. Yu, S. Cheng, T. Zhu, J, Zheng, J. Mo, J. Yan, and Y. Luo. 2011. Nitrogen-15 signals of leaf litter

soil continuum as a possible indicator of ecosystem nitrogen saturation by forest succession and

N loads. Biogeochemistry 102: 251-263.

Feldkirchner, D. C., C. Wang, S. T. Gower, E. L. Kruger, and J. Ferris. 2003. Effects of nutrient and paper

mill biosolids amendments on the growth and nutrient status of hardwood forests. Forest

Ecology and Management 177: 95-116.

Feller, I.C. 1995. Effects of nutrient enrichment on growth and herbivory of dwarf red mangrove

(*Rhizophora mangle*). Ecological Monographs 65: 477-505.

Feller, I. C., C. E. Lovelock, and K. L. McKee. 2007. Nutrient addition differentially affects ecological

processes of *Avicennia germinans* in nitrogen versus phosphorus limited mangrove ecosystems.

Ecosystems 10: 347-359.

Ferrini, F., and M. Baietto. 2006. Response to fertilization of different tree species in the urban

environment. Arboriculture and Urban Forestry 32: 93-99.

Fetcher, N., B.L. Haines, R.A. Cordero, D.J. Lodge, L.R. Walker, D.S. Fernandez, and W.T. Lawrence. 1996.

Responses of tropical plants to nutrients and light on a landslide in Puerto Rico. Journal of

Ecology 84: 331-341.

Fife, D.N., and E.K.S. Nambiar. 1997. Changes in the canopy and growth of *Pinus radiata* in response to

nitrogen supply. Forest Ecology and Management 93: 137-152.

Footen, P.W., R.B. Harrison, and B.D. Strahm. 2009. Long-term effects of nitrogen fertilization on the

productivity of subsequent stands of Douglas-fir in the Pacific Northwest. Forest Ecology and

Management 258: 2194-2198.

Fraterrigo, J.M., S.M. Pearson, and M.G. Turner. 2009. The response of understory herbaceous plants to

nitrogen fertilization in forests of different land-use history. Forest Ecology and Management

257: 2182-2188.

Fu, W., T. Hubert, and Z. Chaosheng. 2010. Spatial variation of soil test phosphorus in a long-term grazed

experimental grassland field. Journal of Plant Nutrition and Soil Science 173: 323-331.

Gadgil, R.l., A.M. Sandberg, and J.D. Graham. 1984. *Lupinus arboreus* and inorganic fertilizer as sources

of nitrogen for *Pinus radiata* on a coastal sand. New Zealand Journal of Forestry Science 14: 257-

276.

Gerdol, R., L. Brancaleoni, R. Marchesini, and L. Bragazza. 2002. Nutrient and carbon relations in

subalpine dwarf shrubs after neighbour removal or fertilization in northern Italy. Oecologia

130: 476-483.

Gibson, K.D., J.B. Zedler, and R. Langis. 1994. Limited response of cordgrass (*Spartina foliosa*) to soil

amendments in a constructed marsh. Ecological Applications 4: 757-767.

Giertych, M. J., M. Bakowski, P. Karolewski, R. Zytkowiak, and J. Grzebyta. 2005. Influence of mineral

fertilization on food quality of oak leaves and utilization efficiency of food components by the

gypsy moth. Entomologia Experimentalis et Applicata 117: 59-69.

Gilbert, M.A., D.G. Edwards, K.A. Shaw, and R.K. Jones. 1989. Effect of phosphorus supply on three

perennial Stylosanthes species in tropical Australia. II. Phosphorus and nitrogen within the plant

and implications for grazing animals. Australian Journal of Botany 40: 1205-1216

Gough, C. M., J.R. Seiler, K.H. Johnsen, and D.A. Sampson. 2004. Season photosynthesis in fertilized and

nonfertilized loblolly pine. Forest Science 50: 1-9.

Gradowski, T., and S.C. Thomas. 2008. Responses of *Acer saccharum* canopy trees and saplings to P, K,

and lime additions under high N deposition. Tree Physiology 28: 173-185.

Harrington, C.A., and C.A. Wierman. 1990. Growth and foliar nutrient response to fertilization and

precommercial thinning in a coastal western red cedar stand. Canadian Journal of Forest

Research 20: 764-773.

Harrington, R.A., J.H. Fownes, and P.M. Vitousek. 2001. Production and resource use efficiencies in N-

and P-limited tropical forests: A comparison of responses to long-term fertilization. Ecosystems

4: 646-657.

Haywood, J.D. 2007. Influence of herbicides and felling, fertilization, and prescribed fire on longleaf pine

establishment and growth through six growing seasons. New Forests 33: 257-279.

Hedwall, P-O., A. Nordin, J. Brunet et al. 2010. Compositional changes of forest-floor vegetation in young

stands of Norway spruce as an effect of repeated fertilization. Forest Ecology and Management

259: 2418-2425.

Heidorn, T.J., and A. Joern. 1987. Feeding preference and spatial distribution of grasshoppers

(Acrididae) in response to nitrogen fertilization of *Calamovilfa longifolia*. Functional Ecology 1:

369-375.

Herbert, D.A., and J.H. Fownes. 1995. Phosphorus limitation of forest leaf area and net primary

productivity on highly weathered tropical montane soils in Hawaii. Biogeochemistry 29: 223-

235.

Hester, M.W., and I.A. Mendelssohn. 1990. Effects on macronutrient and micronutrient additions on

photosynthesis, growth parameters, and leaf nutrient concentrations of *Uniola paniculata* and

*Panicum amarum*. Botanical Gazette 151: 21-29.

Hipps, N. A., M. J. Davies, P. Dodds, and G. P. Buckley. 2005. The effects of phosphorus nutrition and soil

pH on the growth of some ancient woodland indicator plants and their interaction with

competitor species. Plant and Soil 271: 131-141.

Holopainen, J.K., R. Rikala, P. Kainulainen, and J. Oksanen. 1995. Resource partitioning to growth,

storage, and defense in nitrogen fertilized Scots pine and susceptibility of the seedlings to the

tarnished plant bug *Lygus rugulipennis*. New Phytologist 131: 521-532.

Holub, P. and I. Tuma. 2010. The effect of enhanced nitrogen on aboveground biomass allocation and

nutrient resorption in the fern *Athyrium distentifolium*. Plant Ecology 207: 373-380.

Houle, D., and J.-D. Moore. 2008. Soil solution, foliar concentrations and tree growth response to 3-year

of ammonium-nitrate addition in two boreal forests of Quebec, Canada. Forest Ecology and

Management 255: 2049-2060.

Huang, J.-Y., X.-G. Zhu, Z.-Y. Yuan, S.-H. Song, X. Li, and L.-H. Li. 2008. Changes in nitrogen resorption

traits of six temperate grassland species along a multi-level N addition gradient. Plant and Soil

306: 149-158.

Hutchinson, T.C., S.A. Watmough, E.P. Sager, and J.D. Karagatzides. 1998. Effects of excess nitrogen

deposition and soil acidification on sugar maple (*Acer saccharum*) in Ontario, Canada: An

experimental study. Canadian Journal of Forest Research 28: 299-310.

Jacobs, D. F., D. L. Haase, and R. Rose. 2005. Growth and foliar nutrition of Douglas-fir seedlings

provided with supplemental polymer-coated fertilizer. Western Journal of Applied Forestry

20: 58-63.

Jaramillo, V.J., and J.K. Detling. 1992. Small-scale heterogeneity in a semi-arid North American grassland:

Tillering, N uptake, and retranslocation in simulated urine patches. Journal of Applied Ecology

29: 1-8.

Jia, Y., and V. M. Gray. 2003. Interrelationships between nitrogen supply and photosynthetic parameters

in *Vicia faba* L. Photosynthetica 41: 605-610.

Joern, A., and S. Mole. 2005. The plant stress hypothesis and variable responses by blue grama grass

(*Bouteloua gracilis*) to water, mineral nitrogen, and insect herbivory. Journal of Chemical

Ecology 31: 2069-2090.

Johnson, D. W., A. M. Hoylman, J. T. Ball, and R. F. Walker. 2006. Ponderosa pine responses to elevated

CO2 and nitrogen fertilization. Biogeochemistry 77: 157-175.

Johnson, J.E., J.J. Bollig, and R.A. Rathfon. 1998. Above-ground biomass and nutrient distribution of

released and fertilized yellow-poplar trees. Forest Ecology and Management 105: 231-240.

Jones, M. E., T. D. Paine, and M. E. Fenn. 2008. The effect on nitrogen additions on oak foliage and

herbivore communities at sites with high and low atmospheric pollution. Environmental

Pollution 151: 434-442.

Jonsson, A. M., M. Ingerslev, and K. Raulund-Rasmussen. 2004. Frost sensitivity and nutrient status in a

fertilized Norway spruce stand in Denmark. Forest Ecology and Management 201: 199-209.

Joseph, S.V., S.K. Braman, and J.L. Hanula. 2011. Effects of fertilization of four hemlock species on *Adelges tsugae* (Hemiptera: Adelgidae) growth and feeding preferences of predators. Journal of Economic Entomology 104: 288-298.

Kazakou, E., C. Violle, R. Catherine et al. 2011. Litter quality and decomposability of species from a

Mediterrean succession depend on leaf traits but no on nitrogen supply. Annals of Botany 104:

1151-1161.

Kelley, A.M. and H.E. Epstein. 2009. Effects of nitrogen fertilization on plant communities of nonsorted

circles in moist nonacidic tundra, northern Alaska. Arctic Antarctic and Alpine Research 41: 119-

127.

Kelty, M. J., F. D. Menalled, and M. M. Carlton. 2004. Nitrogen dynamics and red pine growth following

application of pelletized biosolids in Massachusetts, USA. Canadian Journal of Forest Research

34: 1477-1487.

Ket, W.A., J.P. Schubauer-Berigan, and C.B. Craft. 2011. Effects of five years of nitrogen and phosphorus

additions on a *Zizaniopsis miliacea* tidal freshwater marsh. Aquatic Botany 95: 17-23.

Kim, Y.T., C. Glerum, J. Stoddart, and S.J. Colombo. 1987. Effect of fertilization on free amino acid

concentrations in black spruce and jack pine containerized seedlings. Canadian Journal of Forest

Research 17: 27-30.

Kishchuk, B. E., G. F. Weetman, R. P. Brockley, and C. E. Prescott. 2002. Fourteen-year growth response

of young lodgepole pine to repeated fertilization. Canadian Journal of Forest Research 32: 153-

160.

Kowaljow, E., M.J. Mazzarino, and P. Satti. 2010. Organic and inorganic fertilizer effects on a degraded

Patagonian rangeland. Plant and Soil 332: 135-145.

Kuers, K., and K. Steinbeck. 1998. Foliar nitrogen dynamics in *Liquidambar styraciflua* saplings: Response

to nitrogen fertilization. Canadian Journal of Forest Research 28: 1671-1680.

Kyle, K. H., L. J. Andres, T. R. Fox, W. M. Aust, J. A. Burger, and G. H. Hansen. 2005. Long-term effects of

drainage, bedding, and fertilization on growth of loblolly pine (*Pinus taeda* L.) in the coastal plain

of Virginia. Southern Journal of Applied Forestry 29: 205-214.

Lechowicz, M.J. and G.R. Shaver. 1982. A multivariate approach to the analysis of factorial fertilization

experiments in Alaskan arctic tundra. Ecology 63: 1029-1038.

Leoni, V., V. Pasqualini, C. Pergent-Martini, A. Vela, and G. Pergent. 2007. Physiological responses of

*Posidonia oceanica* to experimental nutrient enrichment of the canopy water. Journal of

Experimental Marine Biology and Ecology 349: 73-83.

Liang, H., and S. X. Chang. 2004. Response of trembling and hybrid aspens to phosphorus and sulfur

fertilization in a Gray Luvisol: growth and nutrient uptake. Canadian Journal of Forest Research

34: 1391-1399.

Lin, C., Z. Jie, X. Daping, Z. Zhigang, G. Junjie, L. Kaiquin, and S. Er. 2010. Effects of exponential nitrogen

loading on growth and foliar nutrient status of *Betula alnoides* seedlings. Scientia Silvae Sinicae

46: 35-40.

Lindroth, R. L., T. L. Osier, H. R. H. Barnhill, and S. A. Wood. 2002. Effects of genotype and nutrient

availability on phytochemistry of trembling aspen (*Populus tremuloides* Michx.) during leaf

senescence. Biochemical Systematics and Ecology 30: 297-307.

Lipson, D.A., W.D. Bowman, and R.K. Monson. 1996. Luxury uptake and storage of nitrogen in the

rhizomatous alpine herb, *Bistorta bistortoides*. Ecology 77: 1277-1285.

Ljungstrom, M., and B. Nihlgard. 1995. Effects of lime and phosphate additions on nutrient status and

growth of beech (*Fagus sylvatica* L.) Forest Ecology and Management 74: 133-148.

Lkhagvasuren, B., J.J. Schoenau, D.W. Anderson, and S.S. Malhi. 2011. Plant and soil responses to nitrogen and phosphorus fertilization of bromegrass-dominated haylands in Saskatchewan, Canada. Grass and Forage Science 66: 351-360.

Loaiza, V., J.L. Jonas, and A. Joern. 2011. Grasshoppers (Orthoptera: Acrididae) select vegetation patches in local-scale responses to foliar nitrogen but not phosphorus in native grassland. Insect Science 18: 533-540.

Lovett, G.M. and C.L. Goodale. 2011. A new conceptual model of nitrogen saturation based on

experimental nitrogen addition to an oak forest. Ecosystems 14: 615-631.

Lu, X., Q. Cui, Q. Wang, and X. Han. 2011. Nutrient resorption response to fire and nitrogen addition in a

semi-arid grassland. Ecological Engineering 37: 534-538.

Magill, A.H., J.D. Aber, G.M. Bernston, W.H. McDowell, K.J. Nadelhoffer, J.M. Melillo, and P. Steudler.

2000. Long-term nitrogen additions and nitrogen saturation in two temperate forests.

Ecosystems 3: 238-253.

Magill, A. H., J. D. Aber, W. S. Currie, K. J. Nadelhoffer, M. E. Martin, W. H. McDowell, J. M. Melillo, and

P. Steudler. 2004. Ecosystem response to 15 years of chronic nitrogen additions at the Harvard

Forest LTER, Massachusetts, USA. Forest Ecology and Management 196: 7-28.

Martin, T. A., and E. J. Jokela. 2004. Stand development and production dynamics of loblolly pine under

a range of cultural treatments in north-central Florida USA. Forest Ecology and Management

192: 39-58.

Matsushima, M., and S. X. Chang. 2006. Vector analysis of understory competition, N fertilization, and

litter layer removal effects on white spruce growth and nutrition in a 13-year-old plantation

Forest Ecology and Management 236: 332-341.

Matthes-Sears., U., C.H. Nash. and D.W. Larson. 1995. Constrained growth of trees in a hostile

environment: The role of water and nutrient availability for *Thuja occidentalis* on cliff faces.

International Journal of Plant Sciences 156: 311-319.

McCullough, D.G., and H.M. Kulman. 1991. Effects of nitrogen fertilization on young Jack Pine, *Pinus*

*Banksiana*, and on its suitability as a host for Jack Pine Budworm (*Choristoneura pinus pinus*)

(Lepidopterae: Tortricidae). Canadian Journal of Forest Research 21: 1447-1558.

McKinnon, M.L., D.T. Quiring, and E. Bauce. 1998. Influence of resource availability on growth and foliar

chemistry within and among young white spruce trees. Ecoscience 5: 295-305.

McNulty, S., and J. Boggs. 2005. Red spruce ecosystem level changes following 14 years of chronic N

fertilization. Forest Ecology and Management 219: 279-291.

Mead, D.J., S.X. Chang, and C.M. Preston. 2008. Recovery of N-15-urea 10 years after application to a

Douglas-fir pole stand in coastal British Columbia. Forest Ecology and Management 256: 694-

701.

Meason, D.F., T.W. Idol, J.B. Friday, and P.G. Scowcroft. 2009. Effects of fertilization on phosphorus pools in the volcanic soil of a managed tropical forest. Forest Ecology and Management 258: 2199-2206.

Miller, H.G., J.M. Cooper, and J.D. Miller. 1976. Effect of nitrogen supply on nutrients in litter fall and

crown leaching in a stand of Corsican Pine. Journal of Applied Ecology 13: 233-248.

Miller, R.F., P.S. Doescher, and J. Wang. 1991a. Response of *Artemisia tridentata spp. wyomingensis* and

*Stipa thurberiana* to nitrogen amendments. American Midland Naturalist 125: 104-113.

Moilanen, M. 2005. Long-term effects of apatite and biotite on the nutrient status and stand growth of

Scots pine (*Pinus sylvestris* L.) on drained peatlands. Suo (Helsinksi) 56: 115-128.

Morecroft, M.D., E.K. Sellers, and J.A. Lee. 1994. An experimental investigation into the effects of

atmospheric nitrogen deposition on two semi-natural grasslands. Journal of Ecology 82: 475-

483.

Munger, G. T., R. E. Will, and B. E. Borders. 2003. Effects of competition control and annual nitrogen

fertilization on gas exchange of different-aged *Pinus taeda*. Canadian Journal of Forest Research

33: 1076-1083.

Murthy, R., P.M. Dougherty, S.J. Zarnoch, and H.L. Allen. 1996. Effects of carbon dioxide, fertilization,

and irrigation on photosynthetic capacity of loblolly pine trees. Tree Physiology 16: 537-546.

Nakamura, M., T. Hina, E. Nabeshima, and T. Hiura. 2008. Do spatial variation in leaf traits and herbivory

within a canopy respond to selective cutting and fertilization? Canadian Journal of Forest

Research 38: 1603-1610.

Nambiar, E.K.S., and D.N. Fife. 1987. Growth and nutrient retranslocation in needles of radiata pine in

relation to nitrogen supply. Annals of Botany 60: 147-156.

Natali, S.M., S. Sanudo-Wilhemy, and M.T. Lerdau. 2009. Effects of elevated carbon dioxide and nitrogen

fertilization on nitrate reductase activity in sweetgum and loblolly pine trees in two temperate

forests. Plant and Soil 314: 197-210.

Neilsen, W.A. 1996. Response of *Eucalyptus nitens* and *Eucalyptus regnans* seedlings to application of

various fertilizers at planting or soon after planting. New Zealand Journal of Forestry Science 26:

355-369.

Newton, A.C., and C.D. Pigott. 1991. Mineral nutrition and mycorrhizal infection of seedling oak and

birch: The effect of fertilizers on growth, nutrient uptake and ectomycorrhizal infection. New

Phytologist 117: 45-52.

Niva, M., B. M. Svensson, and P. S. Karlsson. 2003. Nutrient resorption from senescing leaves of the

clonal plant *Linnaea borealis* in relation to reproductive state and resource availability.

Functional Ecology 17: 438-444.

Nobel, P.S., E. Quero, and H. Linares. 1989. Root versus shoot biomass: responses to water, nitrogen,

and phosphorus applications for *Agave lechuguilla*. Botanical Gazette 150: 411-416.

Nordin, A., T. Nasholm, and L. Ericson. 1998. Effects of simulated N deposition on understorey

vegetation of a boreal coniferous forest. Functional Ecology 12: 691-699.

Ohlson, M., A. Nordin, and T. Nasholm. 1995. Accumulation of amino acids in forest plants in relation to

ecological amplitude and nitrogen supply. Functional Ecology 9: 596-605.

Oskarsson, H., A. Sigurgeirsson, and K. Raulund-Rasmussen. 2006. Survival, growth, and nutrition of tree

seedlings fertilized at planting on Andisol soils in Iceland: Six-year results. Forest Ecology and

Management 229: 88-97.

Pakeman, R.J., and J.A. Lee. 1991. The ecology of strandline annuals *Cakile maritima* and *Salsola kali*.

The role of nitrogen in controlling plant performance. Journal of Ecology 79: 155-165.

Peek, M.S. and I.N. Forseth. 2009. Positive effects of soil nitrogen pulses on individuals can have negative consequences for population growth during drought in a herbaceous desert perennial. Journal of Ecology 97: 440-449.

Pinkard, E. A. 2003. Growth and physiological responses of Blackwood (*Acacia melanoxylon*) growing

with a *Pinus radiata* nurse crop following applications of nitrogen and phosphorus. Trees 17: 325-335.

Pinkard, E. A., C. C. Baillie, V. Patel, S. Paterson, M. Battaglia, P. J. Smethurst, C. L. Mohammed, T.

Wardlaw, and C. Stone. 2006. Growth responses of *Eucalyptus globulus* Labill. to nitrogen

application and severity, pattern and frequency of artificial defoliation. Forest Ecology and

Management 229: 378-387.

Popp, M.P., H.M. Kulman, and E.H. White. 1986. The effect of nitrogen fertilization of white spruce,

*Picea glauca*, on the yellow-headed spruce sawfly, *Pikonema alaskensis*. Canadian Journal of

Forest Research 16: 832-835.

Prestidge, R.A. 1982. The influence of nitrogenous fertilizer on grassland Auchenorrhyncha (Homoptera).

Journal of Applied Ecology 19: 735-749.

Prietzel, J. and U. Stetter. 2010. Long-term trends of phosphorus nutrition and topsoil phosphorus stocks

in unfertilized and fertilized Scots pine (*Pinus sylvestris*) stands at two sites in Southern

Germany. Forest Ecology and Management 259: 1141-1150.

Purwanto, B. H., K. Kakuda, H. Ando, J. F. Shoon, Y. Yamamoto, A. Watanabe, and T. Yoshida. 2002.

Nutrient availability and response of sago palm (*Metroxylon sagu* Rottb.) to controlled release N

fertilizer on coastal lowland peat in the tropics. Soil Science and Plant Nutrition 48: 529-537.

Quaye, A.K., T.A. Volk, S. Hafner, D.J. Leopold, and C. Schirmer. 2011. Impacts of paper sludge and manure on soil and biomass production of willow. Biomass and Bioenergy 35: 2796-2806.

Rothstein, D. E. 2005. Nitrogen management in a Fraser fir (*Abies fraseri* [Pursh] Poir.) Christmas tree

plantation: Effects of fertilization on tree performance and nitrogen leaching. Forest Science

51: 175-184.

Rowe, E. C., J. R. Healey, G. Edwards-Jones, J. Hills, M. Howells, and D. L. Jones. 2006. Fertilizer

application during primary succession changes the structure of plant and herbivore

communities. Biological Conservation 131: 510-522.

Rueth, H. M., J. S. Baron, and E. J. Allstott. 2003. Responses of Engelmann spruce forests to nitrogen

fertilization in the Colorado rocky mountains. Ecological Applications 13: 664-673.

Sager, E. 2005. The effects of UV-B, nitrogen fertilization, and springtime warming on sugar maple

seedlings and the soil chemistry of two central Ontario forests. Canadian Journal of Forest

Research 35: 2432-2446.

Salifu, K. F., K. G. Apostol, D. F. Jacobs, and M. A. Islam. 2008. Growth, physiology, and nutrient

retranslocation in nitrogen-15 fertilized *Quercus rubra* seedlings. Annals of Forest Science

65: 101-110.

Sanborn, P.T., J. Prietzel, and R.P. Brockley. 2005. Soil and lodgepole pine foliar responses to two fertilizer sulphur forms in the Sub-Boreal Spruce zone, central interior British Columbia. Canadian Journal of Forest Research 35: 2316-2322.

Sanderson, K. R., and L. J. Eaton. 2008. Wild blueberry response to phosphorus applied to Prince Edward

Island soils. Canadian Journal of Plant Science 88: 363-366.

Sardans, J., J. Penuelas, and F. Roda. 2006. Plasticity of leaf morphological traits, leaf nutrient content,

and water capture in the Mediterranean evergreen oak *Quercus ilex* subsp. *ballota* in response

to fertilization and changes in competitive conditions. Ecoscience 13: 258-270.

Sayer, M. A. S., J. C. G. Goeltz, J. L. Chambers, Z. Tang, T. J. Dean, J. D. Haywood, and D. J. Leduc. 2004.

Long-term trends in loblolly pine productivity and stand characteristics in response to thinning

and fertilization in the West Gulf region. Forest Ecology and Management 192: 71-96.

Scott, A. D., J. A. Burger, D. J. Kaczmarek, and M. B. Kane. 2004. Growth and nutrition response of young

sweetgum plantations. Forest Ecology and Management 189: 331-343.

Scowcroft, P. G., and J. A. Silva. 2005. Effects of phosphorus fertilization, seed source, and soil type on

growth of *Acacia koa*. Journal of Plant Nutrition 28: 1581-1603.

Shaikh, N. P., M. B. Adjei, and J. M. Scholberg. 2008. Interactive effect of phosphorus and nitrogen on

leaf anthocyanins, tissue nutrient concentrations, and dry-matter yield of floralta limpograss

during short day length. Communications in Soil Science and Plant Analysis 39: 1006-1015.

Shujauddin, N., and M. B. Kumar. 2003. *Ailanthus triphysa* at different densities and fertilizer regimes in

Kerala, India: Growth, yield, nutrient use efficiency and nutrient export through harvest. Forest

Ecology and Management 180: 135-151.

Sicard, C., L. Saint-Andre, D. Gelhaye, and J. Ranger. 2006. Effect of initial fertilization on biomass and

nutrient content of Norway spruce and Douglas-fir plantations at the same site. Trees 20: 229-246.

Singh, M., M. Naeem, and M. N. Khan. 2005. Physiomorphological response of *Withania sominifera* as

affected by nitrogen fertilization. Advances in Plant Sciences 18: 669-673.

Son, Y. 2002. Effects of nitrogen fertilization on foliar nutrient dynamics in ginkgo seedlings. Journal of

Plant Nutrition 25: 93-102.

Startsev, N. A., V. J. Lieffers, and D. H. McNabb. 2007. Effects of feathermoss removal, thinning, and

fertilization on lodgepole pine growth, soil microclimate and stand nitrogen dynamics. Forest

Ecology and Management 240: 79-86.

Talhelm, A.F., K.S. Pregitzer, and A.J. Burton. 2011. No evidence that chronic nitrogen additions increase

photosynthesis in mature sugar maple forests. Ecological Applications 21: 2413-2424.

Tanner, E.V.J., V. Kapos, S. Freskos, J.R. Healey, and A.M. Theobald. 1990. Nitrogen and phosphorus

fertilization of Jamaican montane forest trees. Journal of Tropical Ecology 6: 231-238.

Thomas, V. F. D., S. Braun, and W. Fluckiger. 2006. Effects of simultaneous ozone exposure and nitrogen

loads on carbohydrate concentrations, biomass, growth, and nutrient concentrations of young

beech trees (*Fagus sylvatica*). Environmental Pollution 143: 341-354.

Tripepi, R. R., M. W. George, A. K. Linskey, J. E. Lloyd, and J. L. V. Wagoner. 2007. Nutrient treatments

used on field-harvested Colorado spruce trees to maintain postharvest quality. Hortscience

42: 1705-1709.

Trubat, R., J. Cortina, and A. Vilagrosa. 2011. Nutrient deprivation improves field performance of woody

seedlings in a degraded semi-arid shrubland. Ecological Engineering 37: 1164-1173.

Turnbull, T. L., N. Kelly, M. A. Adams, and C. R. Warren. 2007. Within-canopy nitrogen and

photosynthetic gradients are unaffected by soil fertility in field-grown *Eucalyptus globulus*. Tree

Physiology 27: 1607-1617.

Turner, J., M. J. Lambert, and F. R. Humphreys. 2002. Continuing growth response to phosphate

fertilizers by a *Pinus radiata* plantation over fifty years. Forest Science 48: 556-568.

Tyree, M.C., J.R. Seiler, and C.A. Maier. 2009. Short-term impact of nutrient manipulations on leaf gas

exchange and biomass partitioning in contrasting 2-year old *Pinus taeda* clones during seedling

establishment. Forest Ecology and Management 257: 1847-1858.

Valdecantos, A., J. Cortina., and V. Vallejo. 2011. Differential field response of two Mediterranean tree

species to inputs of sewage sludge at the seedling stage. Ecological Engineering 37: 1350-1359.

van den Driessche, R., W. Rude, and L. Martens. 2003. Effect of fertilization and irrigation on growth of

aspen (*Populus tremuloides* Michx.) seedlings over three seasons. Forest Ecology and

Management 186: 381-389.

van den Driessche, R., B. R. Thomas, and D. P. Kamelchuk. 2008. Effects of N, NP, and NPKS fertilizers

applied to four-year old hybrid poplar plantations. New Forests 35: 221-233.

van der Waal, C. H. de Kroon, Heitkonig Ignas, M.A. et al. 2011. Scale of nutrient patchiness mediates

resource partitioning between trees and grasses in a semi-arid savanna. Journal of Ecology 99:

1124-1133.

Van Heerwaarden, L. M., S. Toet, and R. Aerts. 2003. Nitrogen and phosphorus resorption efficiency and

proficiency in six sub-arctic bog species after 4 years of nitrogen fertilization. Journal of Ecology

91: 1060-1070.

Vitousek, P.M., Walker, L.R., Whiteaker, L.D., and P.A. Matson. 1993. Nutrient limitations to plant

growth during primary succession in Hawaii Volcanoes National Park. Biogeochemistry 23: 197-

215.

Vitousek, P.M. 1998. Foliar and litter nutrients, nutrient resorption, and decomposition in Hawaiian

*Metrosideros polymorpha*. Ecosystems 1: 401-407.

von Oheimb, G., S.A. Powser, K. Falk et al. 2010. N:P ratio and the nature of nutrient limitation in

Calluna-dominated heathlands. Ecosystems 13: 317-327.

Walker, R. F. 2005. Growth and nutrition of Jeffrey pine seedlings on a Sierra Nevada surface mine in

response to fertilization three years after planting. Western Journal of Applied Forestry 20: 28-

35.

Walker, R.F. 2011. Nutritional augmentation of Jeffrey Pine saplings on a harsh Sierran site. Journal of

Sustainable Forestry 30: 263-283.

Wang, L., P. D'Odorico, L.R. O'Halloran, K. Caylor, and S. Macko. 2010. Combined effects of soil moisture and nitrogen availability variations on grass productivity in African savannas. Plant and Soil 328: 95-108.

Wang, P., B. A. Olsson, and H. Lundkvist. 2007. Effects of wood ash, vitality fertilizer and logging residues

on needle and root chemistry in a young Norway spruce stand. Scandinavian Journal of Forest

Research 22: 136-148.

Weand, M.P. M.A. Arthur, G.M. Lovett, F. Sikora, and K.C. Weathers. 2010. The phosphorus status of

northern hardwoods differs by species but is unaffected by nitrogen fertilization.

Biogeochemistry 97: 159-181.

Wesche, K. and K. Ronnenberg. 2010. Effects of NPK fertilization in arid southern Mongolian desert

steppes. Plant Ecology 207: 93-105.

Weisenborn, W.D. 2011. Biomasses of srthropod taxa differentially increase on nitrogen-fertilized

willows and cottonwoods. Restoration Ecology 19: 323-332.

Will, R. E., D. Markewitz, R. L. Hendrick, D. F. Meason, T. R. Crocker, and B. E. Borders. 2006. Nitrogen

and phosphorus dynamics for 13-year old loblolly pine stands receiving complete competitions

control and annual N fertilizer. Forest Ecology and Management 227: 155-168.

Xu, D., B. Dell, Z. Yang, N. Malajczuk, and M. Gong. 2005. Effects of phosphorus application on

productivity and nutrient accumulation of a *Eucalyptus urophylla* plantation. Journal of Tropical

Forest Science 17: 447-461.

Yelenik, S.G., S.S. Perakis, and D.E. Hibbs. Regional contraints to biological nitrogen fixation in post-fire

forest succession. Unpublished.
